# Supplementary material for: Transcriptome analysis reveals mechanism of early ripening in Kyoho grape with hydrogen peroxide treatment
Source: PubMed Central journal article supplement (PMC7657363; doi:10.1186/s12864-020-07180-y), 2020-11-11

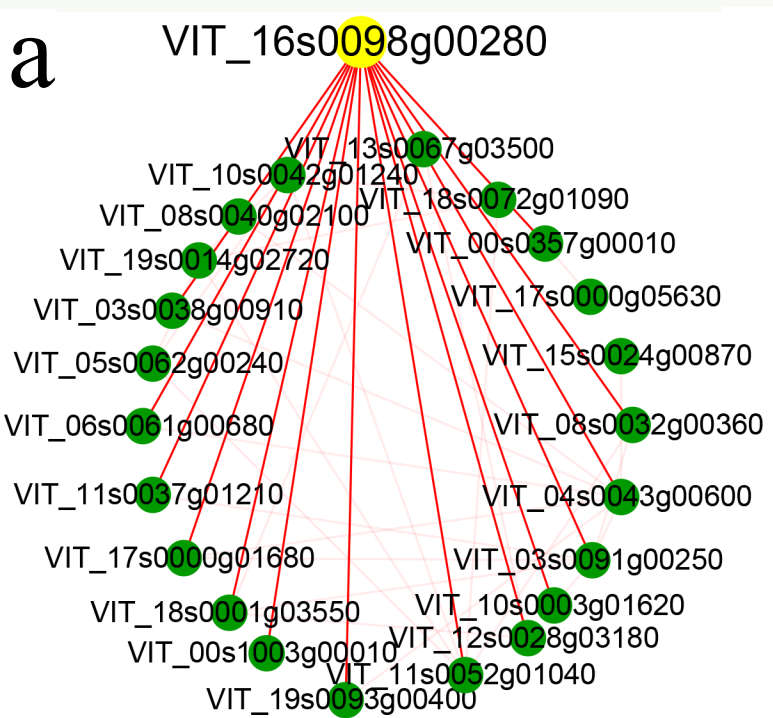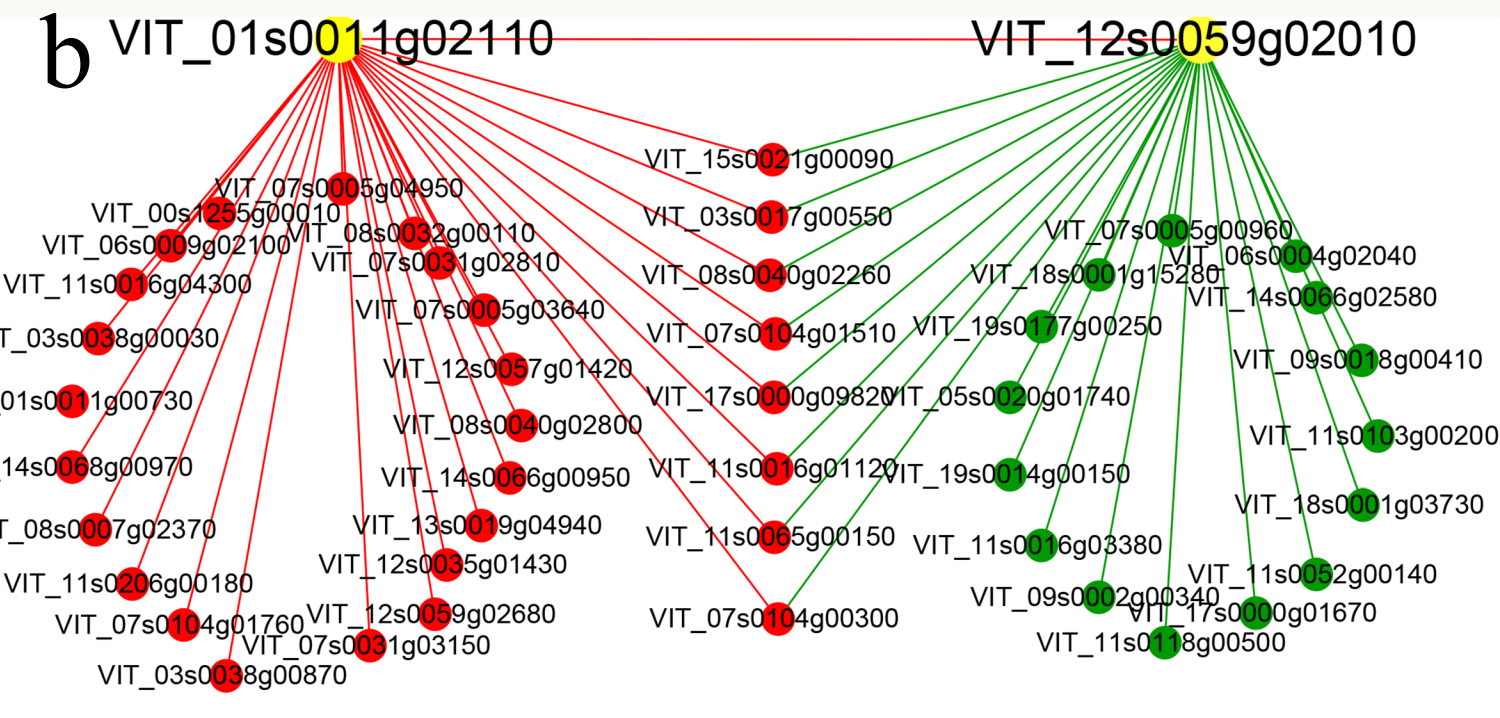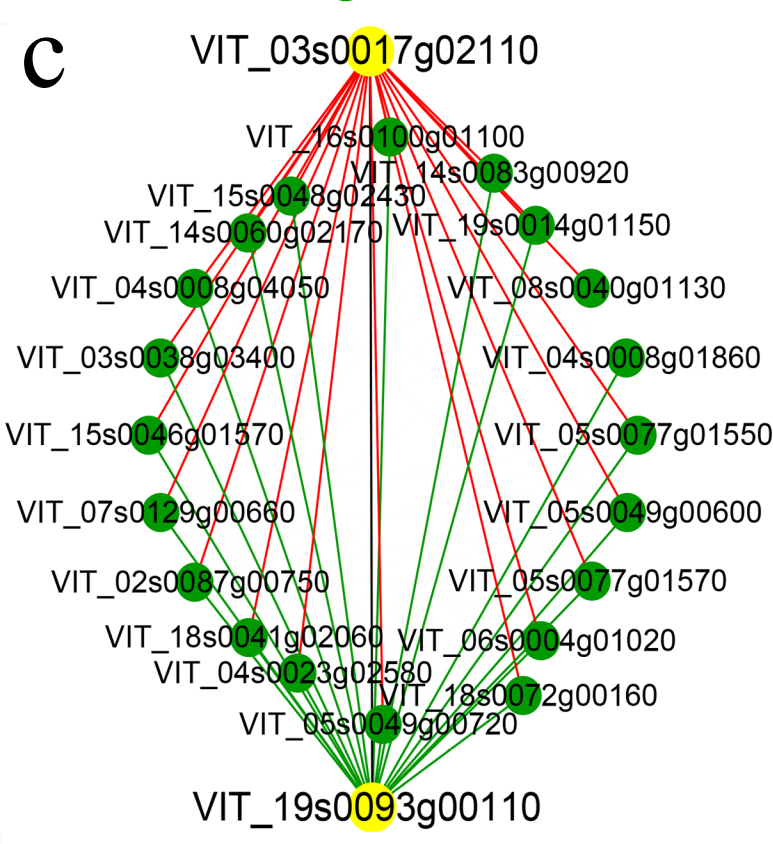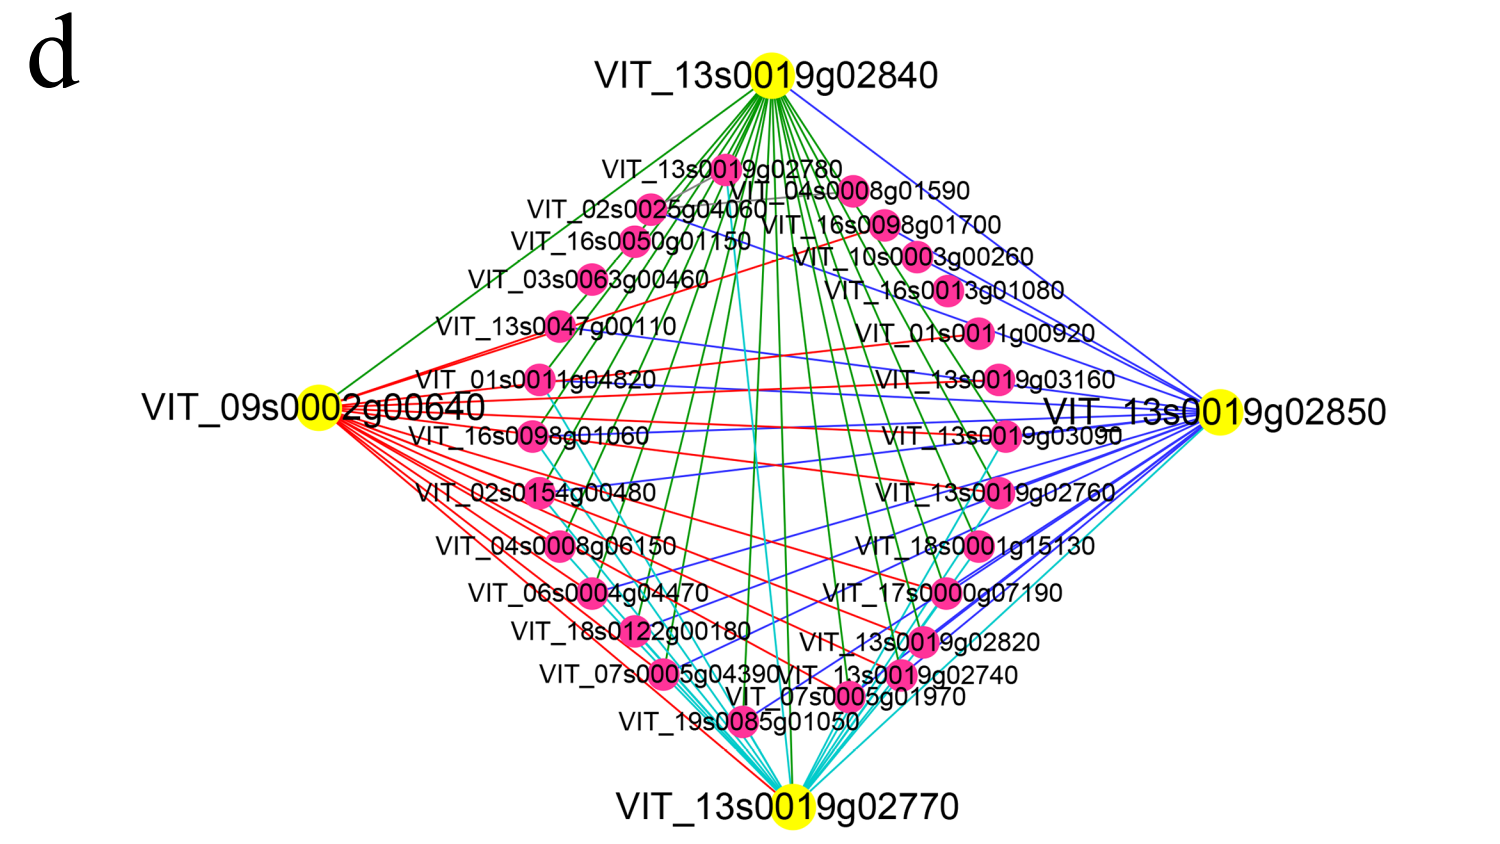

Supplement: 12864_2020_7180_MOESM7_ESM.pdf [file 12864_2020_7180_MOESM7_ESM.pdf]
