# Supplementary material for: Transcriptome analysis reveals mechanism of early ripening in Kyoho grape with hydrogen peroxide treatment
Source: PubMed Central journal article supplement (PMC7657363; doi:10.1186/s12864-020-07180-y), 2020-11-11
Supplement: 12864_2020_7180_MOESM8_ESM.pdf [file 12864_2020_7180_MOESM8_ESM.pdf]

$\log_2(\text{expression ratio})$  obtained by qRT-PCR

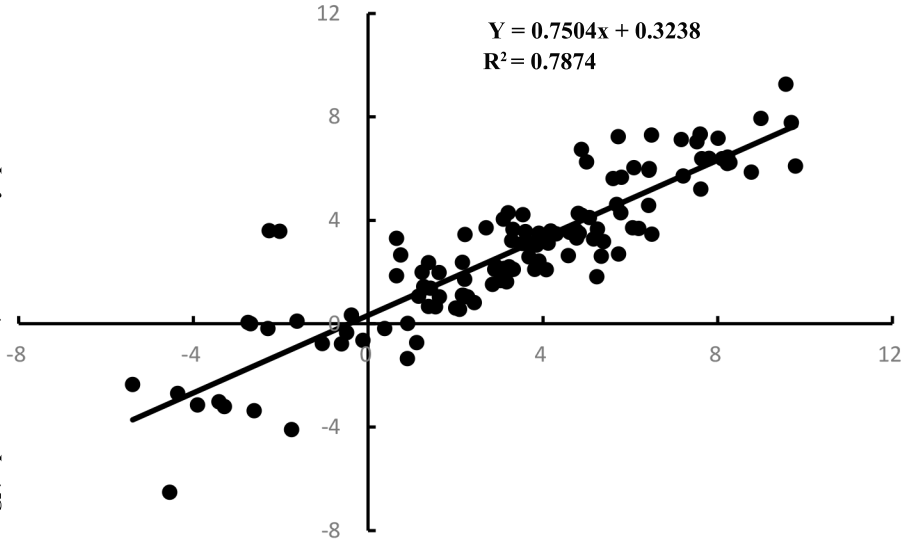

$\log_2(\text{expression ratio})$  obtained by RNA-seq data
